# Supplementary material
Source: Springer Nature journal article supplement (https://www.springermedizin.de/resource/supplementary/12884_2012_544_MOESM3_ESM.pdf/9457968)
Supplement: MOESM3 [file 9457968]

Mothers**T1: 15 weeks gestation**

- Depressive symptoms (EDS + SCL-90)
- Anxiety (STAI + SCL-90)
- Personality (DS14)
- Demographic information

**T2: 26 weeks gestation**

- Prenatal representations of unborn child (WMCI, PRAM)
- Prenatal expectations of infant temperament (ICQ)
- Depressive symptoms (EDS + SCL-90)
- Anxiety (STAI + SCL-90)
- Personality (QBF)
- Perceived stress (PSS)
- Maternal orientation (PPQ)
- Attachment style (RQ)
- Prenatal attachment (MAAS)

**T3: 36 weeks gestation**

- Depressive symptoms (EDS + SCL-90)
- Anxiety (STAI + SCL-90)
- Relationship with partner (VGP)
- Resiliency (ER89)

**T4: Birth**

- DFSI
- Obstetric information

**T5: 4 months postpartum**

- Depressive symptoms (EDS + SCL-90)
- Anxiety (STAI + SCL-90)
- Personality (QBF, DS14)
- Perceived stress (PSS)
- Parent-child relationship (PBQ)
- Child development (ASQ)

**T5: 4 months postpartum**

- Depressive symptoms (EDS + SCL-90)
- Anxiety (STAI + SCL-90)
- Personality (QBF, DS14)
- Perceived stress (PSS)
- Parent-child relationship (PBQ)
- Resiliency (ER89)

**T6: 6 months postpartum**

- Representations of the child (WMCI, PRAM)
- Mother-child interaction (NICHD)
- Child temperament (ICQ)
- Relationship with partner (VGP)
- Mother-infant attachment (MPAS)
- Parenting self-efficacy (PMP-SE)
- Maternal orientation (FRQ)
- Child development (ASQ)
- Child social-emotional development (ASQ-SE)

**T6: 6 months postpartum**

- Representations of the child (WMCI, PRAM)
- Child temperament (ICQ)
- Relationship with partner (VGP)
- Father-infant attachment (PPAS)
- Parenting self-efficacy (PMP-SE)

**T7: 12 months postpartum**

- Depressive symptoms (EDS)
- Anxiety (STAI)
- Child development (ASQ)
- Child social-emotional development (ASQ-SE)
- Infant behavior (ITSEA, IBQ-R)
- Information from National Health Care Centres

**T8: 24 months postpartum**

- Representations of the child (PRAM)
- Mother-infant attachment (MPAS)
- Parenting (NOSIK)
- Relationship with partner (VGP)
- Symptoms of anxiety and depression (SAD-4)
- Personality (QBF, DS14)
- Attachment difficulties (ADSI)
- Infant behavior (ECBQ, BITSEA)
- Child cognitive functioning (BRIEF-P)
- Demographic information

**T8: 24 months postpartum**

- Representations of the child (PRAM)
- Father-infant attachment (PPAS)
- Parenting (NOSIK)
- Relationship with partner (VGP)
- Symptoms of anxiety and depression (SAD-4)
- Personality (QBF, DS14)
- Attachment difficulties (ADSI)
- Infant behavior (ECBQ)
- Demographic information

Fathers
